# Supplementary material for: Polarization induced dynamic photoluminescence in carbon quantum dot-based ionic fluid
Source: Royal Society of Chemistry journal article supplement (doi:10.1039/c5ta09709f), 2016-01-01
Supplement: c5ta09709f1.pdf [file c5ta09709f1.pdf]

## ELECTRONIC SUPPLEMENTARY INFORMATION

### Polarization induced dynamic photoluminescence in carbon quantum dot-based ionic fluid<sup>†</sup>

Lopamudra Bhattacharjee,<sup>a</sup> Kallol Mohanta,<sup>a</sup> Kaushik Pal,<sup>b</sup> Apurba L Koner,<sup>b</sup> and Rama Ranjan Bhattacharjee<sup>a\*</sup>

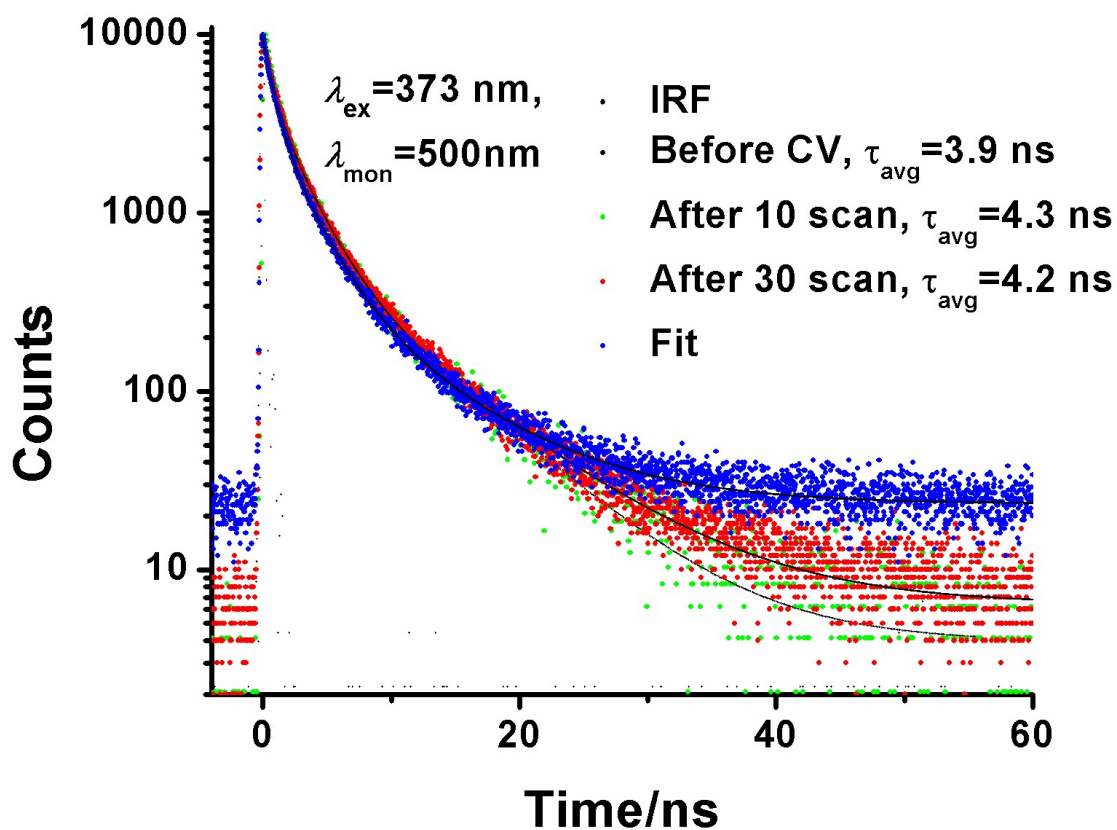

**Fig. ESI 1:** Life-time measurement data of CQD-NIMs before CV and after CV scan. Data shows life-time values obtained after 10 and 30 scans.

### Solubility studies:

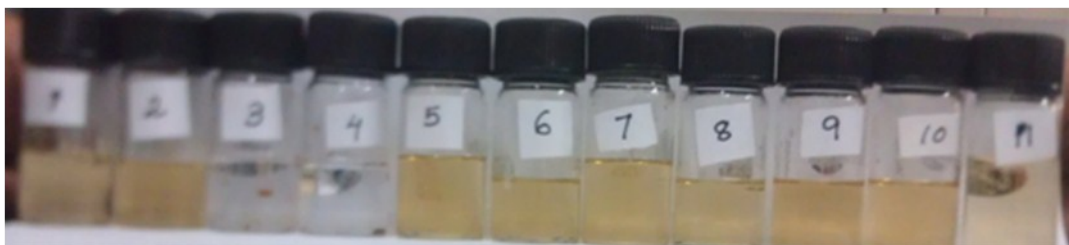

**Fig. ESI 2:** PSS-CQD suspension in Dichloromethane (S1), Chloroform (S2), Petroleum ether (S3), Hexane (S4), Ethylene glycol (S5), DMF (S6), DMSO (S7), Ethanol (S8), Methanol (S9), Acetone (S10) and water (S11)

CQD-NIMs is dispersed nicely in almost all the solvents except in S3 and S4. This suggests CQD-NIMs has both ionic and covalent part in its structure. Stabilization of the species can occur through any of the different non-covalent interactions with the solvent such as H-bonding, dipole-dipole interactions, Van der Waals interactions *etc* and also by formation of solvation sphere in case of covalent structure.

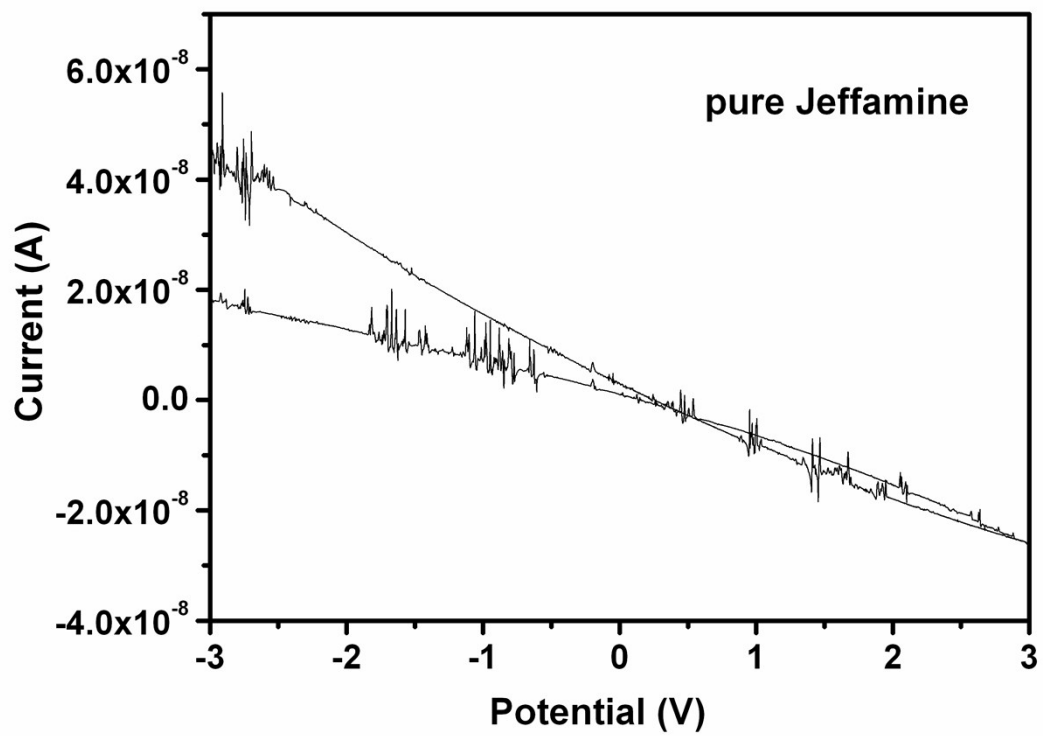

Fig. ESI 3: CV of pure Jeffamine®.

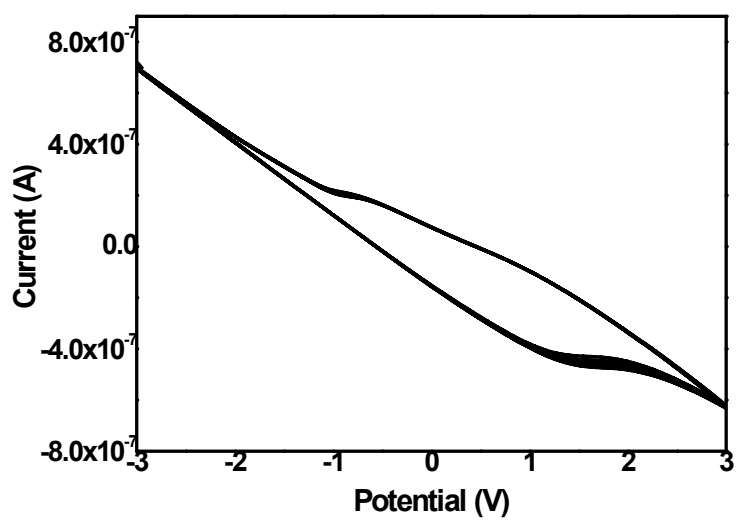

**Fig. ESI 4:** CV of CQD-NIMs showing second and consecutive 10 cycles.
